# Supplementary material for: Quantitative analysis of dinoflagellates and diatoms community via Miseq sequencing of actin gene and v9 region of 18S rDNA
Source: PubMed Central journal article supplement (PMC5056376; doi:10.1038/srep34709), 2016-10-10
Supplement: srep34709-s1.pdf [file srep34709-s1.pdf]

**Title.**

Quantitative analysis of dinoflagellates and diatoms community via Miseq sequencing of *actin* gene and v9 region of 18S rDNA

**Author list and affiliations.**

Guo Liliang<sup>1,2</sup>, gll1224@126.com

Sui Zhenghong<sup>1\*</sup>, suizhengk@ouc.edu.cn

Liu Yuan<sup>1</sup>, liuyuan\_1991@yeah.net

<sup>1</sup>Key Laboratory of Marine Genetics and Breeding of Ministry of Education, College of Marine Life Sciences, Ocean University of China, Qingdao 266003, China.

**Address.** 5 Yushan Road, Qingdao 266003, Shandong, China.

<sup>2</sup>Institution of Plastic Surgery, Weifang Medical University, Weifang, 261042, China.

**Address.** 4948 Shengli East Street, Weifang 261042, Shandong, China.

**\*Corresponding author.**

Sui Zhenghong, suizhengk@ouc.edu.cn, +86-0532-82031128

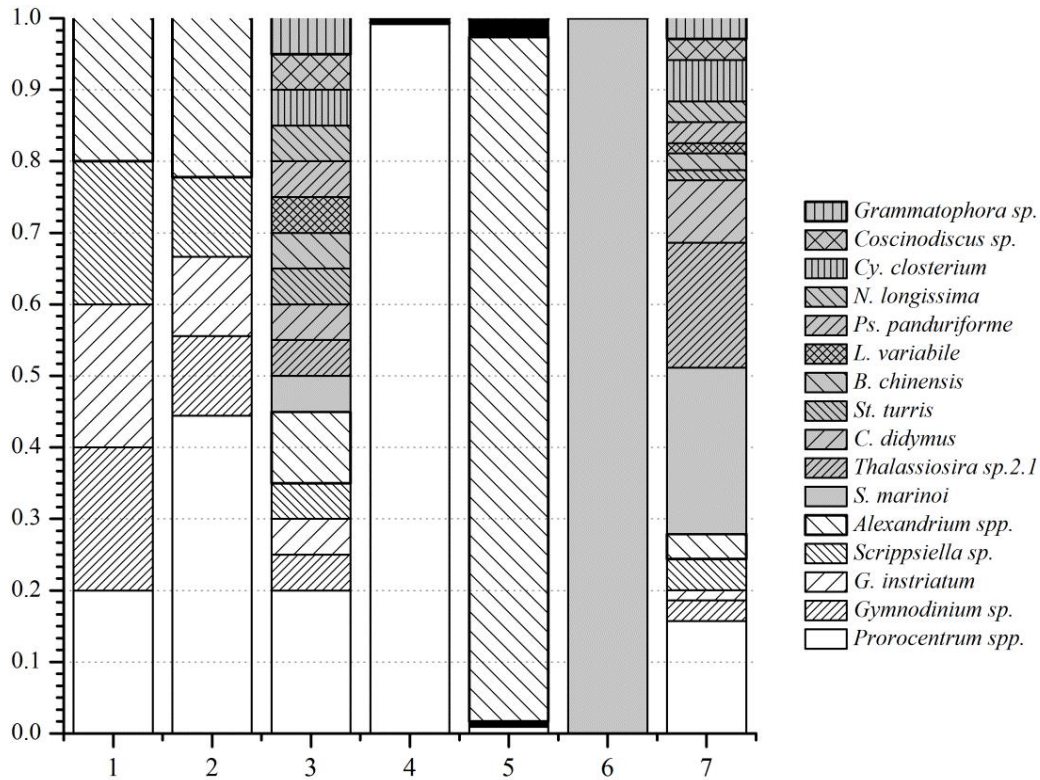

Supplement Fig. 1 Species composition and cell percentage of 7 simulated samples at generic level. Many species just possessed tiny proportion brought out the black bar in column 4, 5 and 6.

Supplement table 1 Statistics on the raw sequence data process and quality control for the *actin* and 18S v9 Miseq sequencing

| Sample | Raw PE (#) | Raw Tags (#) | Effective Tags (#) | Base (nt) | AvgLen (nt) | Q20   | Q30   | GC%   | Effective-P (%) |
|--------|------------|--------------|--------------------|-----------|-------------|-------|-------|-------|-----------------|
| act1.1 | 46850      | 46516        | 46514              | 9570573   | 206         | 98.83 | 98.52 | 59.42 | 99.28           |
| act1.2 | 88642      | 87855        | 87847              | 18098101  | 206         | 98.63 | 98.29 | 61.11 | 99.10           |
| act2   | 46396      | 46075        | 46071              | 9482782   | 206         | 98.70 | 98.31 | 61.29 | 99.30           |
| act3   | 42649      | 42274        | 42269              | 8700308   | 206         | 98.73 | 98.37 | 61.29 | 99.11           |
| act4   | 37535      | 37357        | 37353              | 7703474   | 206         | 98.59 | 98.18 | 61.98 | 99.52           |
| act5   | 44974      | 44687        | 44684              | 9194272   | 206         | 98.80 | 98.50 | 58.22 | 99.36           |
| act6   | 50393      | 49999        | 49987              | 10291238  | 206         | 98.63 | 98.21 | 61.06 | 99.19           |
| act7.1 | 80407      | 79788        | 79787              | 16421574  | 206         | 98.74 | 98.35 | 60.69 | 99.23           |
| act7.2 | 58849      | 58552        | 58550              | 12062858  | 206         | 98.63 | 98.28 | 60.01 | 99.49           |
| v91.1  | 23140      | 23098        | 23093              | 3094436   | 134         | 99.51 | 99.15 | 43.72 | 99.80           |
| v91.2  | 83354      | 82930        | 82917              | 11040412  | 133         | 99.44 | 99.07 | 47.36 | 99.48           |
| v92    | 27490      | 27432        | 27427              | 3675255   | 134         | 99.47 | 99.11 | 43.54 | 99.77           |
| v93    | 33209      | 33056        | 33045              | 4428345   | 134         | 99.41 | 98.98 | 44.07 | 99.51           |
| v94    | 30146      | 30025        | 30015              | 4023594   | 134         | 99.48 | 99.12 | 45.05 | 99.57           |
| v95    | 41153      | 40972        | 40963              | 5488512   | 134         | 99.47 | 99.06 | 47.02 | 99.54           |
| v96    | 54423      | 54330        | 54320              | 7278797   | 134         | 99.45 | 99.07 | 43.34 | 99.81           |
| v97.1  | 80614      | 80223        | 80204              | 10814006  | 135         | 99.28 | 98.80 | 48.72 | 99.49           |

Q20 and Q30 showed the percentage of Effective Tags that the base quality was more than 20 (sequencing error rate < 1%) and 30 (sequencing error rate < 1%); GC% showed the GC content in Effective Tags; Effective-P (%) showed the ratio of Effective Tags to Raw PE reads.

Supplement table 2 Constituent of seven samples and their cell number

| Species                           | Cells of the species in each sample |     |     |         |        |          |         |
|-----------------------------------|-------------------------------------|-----|-----|---------|--------|----------|---------|
|                                   | 1.1/1.2                             | 2   | 3   | 4       | 5      | 6        | 7.1/7.2 |
| <b>Dinoflagellate</b>             |                                     |     |     |         |        |          |         |
| <i>Prorocentrum donghaiense</i>   | 500                                 | 500 | 500 | 1000000 | 500    | 500      | 400     |
| <i>Prorocentrum minimum</i>       | 0                                   | 500 | 500 | 500     | 500    | 500      | 100     |
| <i>Prorocentrum micans</i>        | 0                                   | 500 | 500 | 500     | 500    | 500      | 20      |
| <i>Prorocentrum sigmoides</i>     | 0                                   | 500 | 500 | 500     | 500    | 500      | 20      |
| <i>Scrippsiella</i> sp.           | 500                                 | 500 | 500 | 500     | 500    | 500      | 150     |
| <i>Gymnodinium</i> sp.            | 500                                 | 500 | 500 | 500     | 500    | 500      | 100     |
| <i>Gyrodinium instriatum</i>      | 500                                 | 500 | 500 | 500     | 500    | 500      | 50      |
| <i>Alexandrium</i> sp.            | 0                                   | 500 | 500 | 500     | 500    | 500      | 20      |
| <i>Alexandrium catenella</i>      | 500                                 | 500 | 500 | 500     | 200000 | 500      | 100     |
| <b>Diatom</b>                     |                                     |     |     |         |        |          |         |
| <i>Skeletonema marinoi</i>        | 0                                   | 0   | 500 | 500     | 500    | 10000000 | 800     |
| <i>Thalassiosira</i> sp. 2.1      | 0                                   | 0   | 500 | 500     | 500    | 500      | 600     |
| <i>Chaetoceros didymus</i>        | 0                                   | 0   | 500 | 500     | 500    | 500      | 300     |
| <i>Stephanopyxis turris</i>       | 0                                   | 0   | 500 | 500     | 500    | 500      | 50      |
| <i>Biddulphia chinensis</i>       | 0                                   | 0   | 500 | 500     | 500    | 500      | 80      |
| <i>Lithodesmium variable</i>      | 0                                   | 0   | 500 | 500     | 500    | 500      | 50      |
| <i>Psammodictyon panduriforme</i> | 0                                   | 0   | 500 | 500     | 500    | 500      | 100     |
| <i>Nitzschia longissima</i>       | 0                                   | 0   | 500 | 500     | 500    | 500      | 100     |
| <i>Cylindrotheca closterium</i>   | 0                                   | 0   | 500 | 500     | 500    | 500      | 200     |
| <i>Coscinodiscus</i> sp.          | 0                                   | 0   | 500 | 500     | 500    | 500      | 100     |
| <i>Grammatophora</i> sp.          | 0                                   | 0   | 500 | 500     | 500    | 500      | 100     |

Equal amount of dinoflagellates cells from different genera were mixed in sample 1 to evaluate the amplification efficiency of the primers in different dinoflagellates genera; sample 2 contained equal amount of cells of different dinoflagellates species to simulate the dinoflagellate water system; sample 3 contained more equal amount of cells of different diatoms species based on the containing of sample 2. Sample 4, 5 and 6 imitated the bloom of *P. donghaiense*, *A. catenella* and *S. marinoi*, respectively. It was unequal amount of cells of different dinoflagellates and trace diatom cells in sample 7. Sample 1 and 7 were divided into two equal parts (1.1 and 1.2, 7.1 and 7.2); sample 1.2 and 7.2 were used to do the WGA after total DNA extraction.

Supplement table 3 Alpha diversity indices for the *actin* samples and 18S v9 samples

| samples | OTU<br>(97%) | OTU<br>(95%) | Chao1<br>(97%) | Chao1<br>(95%) | Shannon<br>(97%) | Shannon<br>(95%) |
|---------|--------------|--------------|----------------|----------------|------------------|------------------|
| act1.1  | 497.0        | 321.0        | 540.925        | 353.571        | 4.864            | 4.309            |
| act1.2  | 165.0        | 123.0        | 355.778        | 154.784        | 0.291            | 0.294            |
| act2    | 1042.0       | 572.0        | 1065.697       | 581.091        | 7.870            | 6.873            |
| act3    | 1067.0       | 595.0        | 1137.040       | 620.625        | 7.945            | 6.925            |
| act4    | 249.0        | 162.0        | 265.776        | 184.885        | 4.717            | 4.158            |
| act5    | 555.0        | 370.0        | 662.897        | 412.533        | 4.470            | 3.582            |
| act6    | 1055.0       | 581.0        | 1106.562       | 589.724        | 7.718            | 6.664            |
| act7.1  | 1150.0       | 638.0        | 1217.391       | 652.170        | 7.458            | 6.601            |
| act7.2  | 366.0        | 285.0        | 507.359        | 415.784        | 2.755            | 2.531            |
| v91.1   | 40.0         | 33.0         | 44.583         | 49.500         | 1.241            | 0.335            |
| v91.2   | 15.0         | 14.0         | 15.000         | 19.000         | 0.580            | 0.501            |
| v92     | 21.0         | 14.0         | 22.429         | 15.500         | 1.133            | 0.204            |
| v93     | 55.0         | 39.0         | 65.200         | 54.600         | 1.569            | 0.702            |
| v94     | 63.0         | 45.0         | 76.333         | 64.429         | 1.996            | 1.201            |
| v95     | 60.0         | 35.0         | 89.545         | 46.000         | 1.918            | 1.335            |
| v96     | 11.0         | 6.0          | 14.333         | 9.000          | 0.953            | 0.004            |
| v97.1   | 42.0         | 33.0         | 105.250        | 223.000        | 0.921            | 0.761            |
| v97.2   | 32.0         | 20.0         | 33.000         | 20.000         | 2.868            | 2.419            |

Supplement table 4 Sequences of the primer barcode for each sample

| Sequencing sample | Primer name | Barcode | Sequencing sample | Primer name | Barcode |
|-------------------|-------------|---------|-------------------|-------------|---------|
| act1.1            | act-1F      | CGATGT  | v91.1             | 18-1F       | CTTGTA  |
|                   | act-1R      | GGTAGC  |                   | 18-1R       | CATGGC  |
| act1.2            | act-8F      | ATCACG  | v91.2             | 18-8F       | GTGAAA  |
|                   | act-8R      | GAGTGG  |                   | 18-8R       | GACGAC  |
| act2              | act-2F      | TGACCA  | v92               | 18-2F       | AGTCAA  |
|                   | act-2R      | ATGAGC  |                   | 18-2R       | CATTTT  |
| act3              | act-3F      | GATCAG  | v93               | 18-3F       | AGTTCC  |
|                   | act-3R      | CACGAT  |                   | 18-3R       | CCAACA  |
| act4              | act-4F      | TTAGGC  | v94               | 18-4F       | ATGTCA  |
|                   | act-4R      | ACTGAT  |                   | 18-4R       | CGGAAT  |
| act5              | act-5F      | CAGATC  | v95               | 18-5F       | CCGTCC  |
|                   | act-5R      | CAACTA  |                   | 18-5R       | CTAGCT  |
| act6              | act-6F      | ACTTGA  | v96               | 18-6F       | GTAGAG  |
|                   | act-6R      | CACCGG  |                   | 18-6R       | CTATAC  |
| act7.1            | act-7F      | GGCTAC  | v97.1             | 18-7F       | GTCCGC  |
|                   | act-7R      | CAGGCG  |                   | 18-7R       | CTCAGA  |
| act7.2            | act-9F      | ACAGTG  | v97.2             | 18-9F       | GTGGC   |
|                   | act-9R      | ATTCTT  |                   | 18-9R       | TAATCG  |

Supplemental table 5 Sequence data used as template for the *actin* gene primer design

| GenBank No. | Species                          | Taxonomic status                               |
|-------------|----------------------------------|------------------------------------------------|
| DQ174766    | <i>Symbiodinium</i> sp.          | Dinophyceae; Suessiales; Symbiodiniaceae       |
| AB231900    | <i>Symbiodinium</i> sp.          | Dinophyceae; Suessiales; Symbiodiniaceae       |
| DQ867056    | <i>Karlodinium micrum</i>        | Dinophyceae; Gymnodiniales; Kareniaceae        |
| EF134084    | <i>Karlodinium micrum</i>        | Dinophyceae; Gymnodiniales; Kareniaceae        |
| JX262505    | <i>Lepidodinium chlorophorum</i> | Dinophyceae; Gymnodiniales; Gymnodiniaceae     |
| EF134225    | <i>Noctiluca scintillans</i>     | Dinophyceae; Noctilucales; Noctilucaceae       |
| EU742739    | <i>Amphidinium carterae</i>      | Dinophyceae; Gymnodiniales; Gymnodiniaceae     |
| EU742748    | <i>Amphidinium carterae</i>      | Dinophyceae; Gymnodiniales; Gymnodiniaceae     |
| JX262499    | <i>Adenoides eludens</i>         | Dinophyceae; Gonyaulacales; Gonyaulacaceae     |
| JX262503    | <i>Azadinium spinosum</i>        | Dinophyceae; Gonyaulacales; Amphidomataceae;   |
| HQ391374    | <i>Dinophysis acuminata</i>      | Dinophyceae; Dinophysiales; Dinophysiaceae     |
| HQ391397    | <i>Dinophysis caudata</i>        | Dinophyceae; Dinophysiales; Dinophysiaceae     |
| JX262509    | <i>Thecadinium kofoidii</i>      | Dinophyceae; Peridiniales; Oxytoxaceae         |
| AY423582    | <i>Lingulodinium polyedrum</i>   | Dinophyceae; Gonyaulacales                     |
| JX262504    | <i>Gymnodinium aureolum</i>      | Dinophyceae; Gymnodiniales; Gymnodiniaceae     |
| JX262506    | <i>Pentapharsodinium dalei</i>   | Dinophyceae; Peridiniales; Peridiniaceae       |
| AF421536    | <i>Crypthecodinium cohnii</i>    | Dinophyceae; Gonyaulacales; Crypthecodiniaceae |
| EF133869    | <i>Alexandrium fundyense</i>     | Dinophyceae; Gonyaulacales; Gonyaulacaceae     |
| JX262500    | <i>Alexandrium fundyense</i>     | Dinophyceae; Gonyaulacales; Gonyaulacaceae     |
| JX262501    | <i>Alexandrium minutum</i>       | Dinophyceae; Gonyaulacales; Gonyaulacaceae     |
| AB231901    | <i>Symbiodinium</i> sp.          | Dinophyceae; Suessiales; Symbiodiniaceae       |
